# Supplementary material
Source: PubMed Central journal article supplement (PMC3818338)
Supplement: NIHMS517525-supplement-01.pdf [file NIHMS517525-supplement-01.pdf]

## Supplemental figure 1

| <u>GeneID</u>      | <u>GeneName</u> | <u>avgKOrpkm</u> | <u>avgWTrpkm</u> |
|--------------------|-----------------|------------------|------------------|
| ENSMUSG00000003234 | Abcf3           | 40.29            | 0                |
| ENSMUSG00000028953 | Abcf2           | 34.4             | 0                |
| ENSMUSG00000018800 | Abca5           | 0.86             | 2.39             |
| ENSMUSG00000029408 | Abcb9           | 8.45             | 1.04             |
| ENSMUSG00000020865 | Abcc3           | 2.33             | 0.59             |
| ENSMUSG00000038762 | Abcf1           | 28.6             | 6.03             |
| ENSMUSG00000028970 | Abcb1b          | 15.48            | 1.31             |
| ENSMUSG00000031333 | Abcb7           | 1.41             | 0.38             |
| ENSMUSG00000015243 | Abca1           | 1.48             | 5.3              |
| ENSMUSG00000041797 | Abca9           | 1.15             | 0                |
| ENSMUSG00000028973 | Abcb8           | 11.65            | 0                |
| ENSMUSG00000024030 | Abcg1           | 1.71             | 0.34             |
| ENSMUSG00000026198 | Abcb6           | 2.45             | 0                |
| ENSMUSG00000040136 | Abcc8           | 8.64             | 8.64             |
| ENSMUSG00000072791 | Abcb5           | 0.31             | 0.56             |
| ENSMUSG00000032849 | Abcc4           | 9.63             | 7.43             |
| ENSMUSG00000058355 | Abce1           | 6.04             | 0                |
| ENSMUSG00000028125 | Abca4           | 1.18             | 0.26             |
| ENSMUSG00000032842 | Abcc10          | 2.03             | 1.05             |
| ENSMUSG00000051900 | Abca16          | 2.24             | 0.61             |
| ENSMUSG00000026944 | Abca2           | 6.15             | 0.66             |
| ENSMUSG00000031378 | Abcd1           | 6.11             | 3.96             |
| ENSMUSG00000004668 | Abca13          | 3.68             | 3.95             |
| ENSMUSG00000021240 | Abcd4           | 4.45             | 0                |
| ENSMUSG00000022822 | Abcc5           | 0.82             | 0.49             |
| ENSMUSG00000042476 | Abcb4           | 49.87            | 17.91            |
| ENSMUSG00000050296 | Abca12          | 1.26             | 0.73             |
| ENSMUSG00000040584 | Abcb1a          | 1.05             | 0.73             |
| ENSMUSG00000024130 | Abca3           | 0.56             | 0.35             |
| ENSMUSG00000027048 | Abcb11          | 1.39             | 2.54             |
| ENSMUSG00000023088 | Abcc1           | 5.88             | 2.28             |
| ENSMUSG00000029802 | Abcg2           | 0.45             | 0                |
| ENSMUSG00000031974 | Abcb10          | 2.84             | 3.43             |

## Supplemental figure 2

|       | Gene          | PoolOo1 | PoolOo2 | SoloOo1 | SoloOo2 |
|-------|---------------|---------|---------|---------|---------|
| 1137  | ABCB4_chr7    | 230     | 151     | 164     | 176     |
| 1355  | ABCE1_chr4    | 217     | 151     | 138     | 122     |
| 1443  | ABCC1_chr16   | 130     | 185     | 86      | 213     |
| 1586  | ABCC6P1_chr16 | 130     | 134     | 43      | 401     |
| 1707  | ABCC4_chr13   | 136     | 84      | 121     | 164     |
| 2589  | ABCA1_chr9    | 87      | 168     | 60      | 46      |
| 2723  | ABCD4_chr14   | 87      | 33      | 60      | 183     |
| 3040  | ABCF2_chr7    | 43      | 33      | 103     | 125     |
| 3159  | ABCC5_chr3    | 43      | 84      | 86      | 48      |
| 3212  | ABCA3_chr16   | 24      | 100     | 60      | 95      |
| 3392  | ABCD3_chr1    | 118     | 33      | 95      | 27      |
| 3858  | ABCA2_chr9    | 55      | 33      | 43      | 57      |
| 3885  | ABCB7_chrX    | 49      | 50      | 51      | 34      |
| 4438  | ABCF3_chr3    | 18      | 50      | 69      | 27      |
| 4804  | ABCC6_chr16   | 31      | 50      | 8       | 69      |
| 5077  | ABCC8_chr11   | 80      | 50      | 129     | 0       |
| 5164  | ABCA12_chr2   | 18      | 16      | 60      | 25      |
| 5248  | ABCF1_chr6    | 24      | 16      | 25      | 39      |
| 5796  | ABCC3_chr17   | 6       | 33      | 8       | 74      |
| 5958  | ABCG8_chr2    | 6       | 33      | 17      | 25      |
| 6864  | ABCA5_chr17   | 43      | 16      | 0       | 16      |
| 7016  | ABCA11P_chr4  | 31      | 33      | 8       | 0       |
| 7370  | ABCA4_chr1    | 6       | 0       | 17      | 37      |
| 7817  | ABCB8_chr7    | 6       | 16      | 0       | 16      |
| 7899  | ABCD1_chrX    | 6       | 0       | 34      | 6       |
| 8058  | ABCC10_chr6   | 6       | 16      | 0       | 9       |
| 8423  | ABCB9_chr12   | 18      | 0       | 0       | 23      |
| 8554  | ABCG4_chr11   | 18      | 0       | 0       | 18      |
| 10153 | CABC1_chr1    | 0       | 0       | 0       | 18      |
| 10223 | ABCA10_chr17  | 0       | 16      | 0       | 0       |
| 11192 | ABCA9_chr17   | 6       | 0       | 0       | 0       |
| 11580 | ABCA17P_chr16 | 0       | 0       | 0       | 4       |
| 11979 | ABCG2_chr4    | 0       | 0       | 0       | 2       |
| 12196 | ABCB10_chr1   | 0       | 0       | 0       | 2       |
| 12326 | ABCC12_chr16  | 0       | 0       | 0       | 2       |
| 12386 | ABCC9_chr12   | 0       | 0       | 0       | 2       |
| 12434 | ABCA7_chr19   | 0       | 0       | 0       | 2       |

### Supplemental figure 3

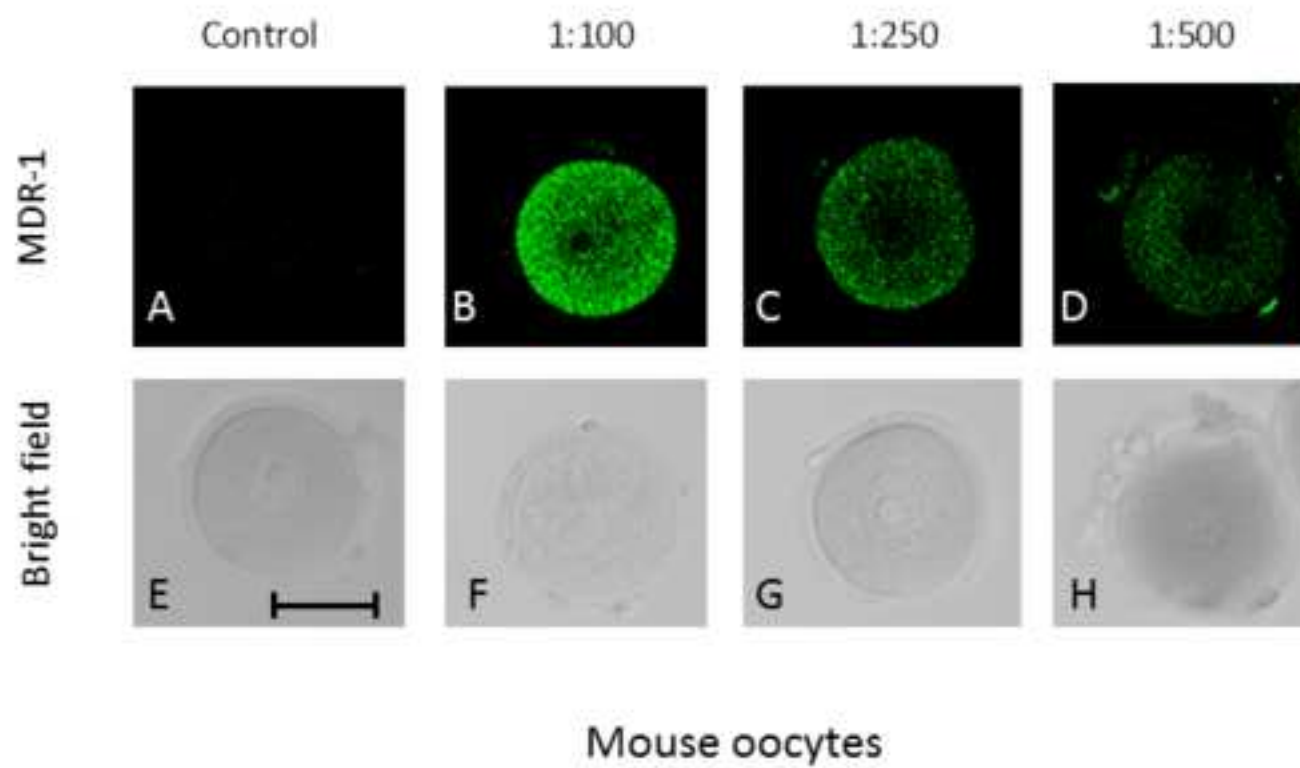

### Supplemental figure 4

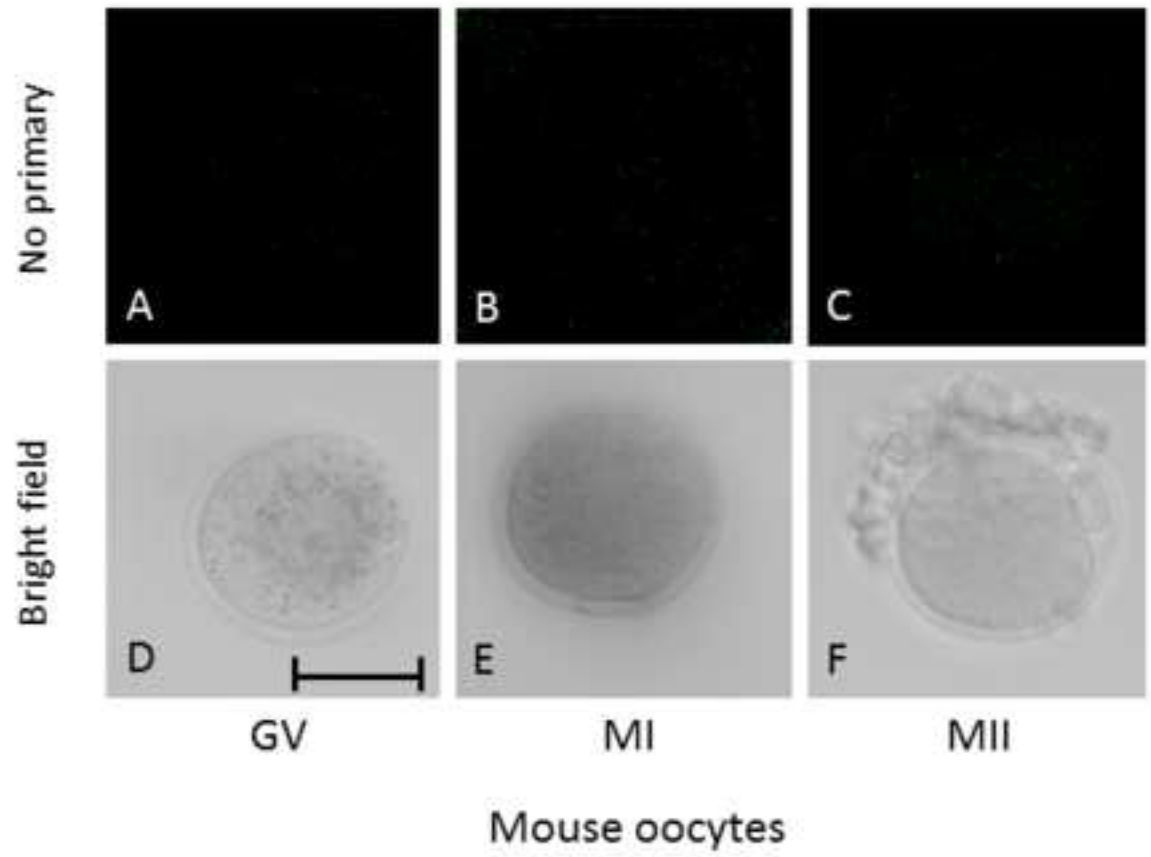

## Supplemental figure 5

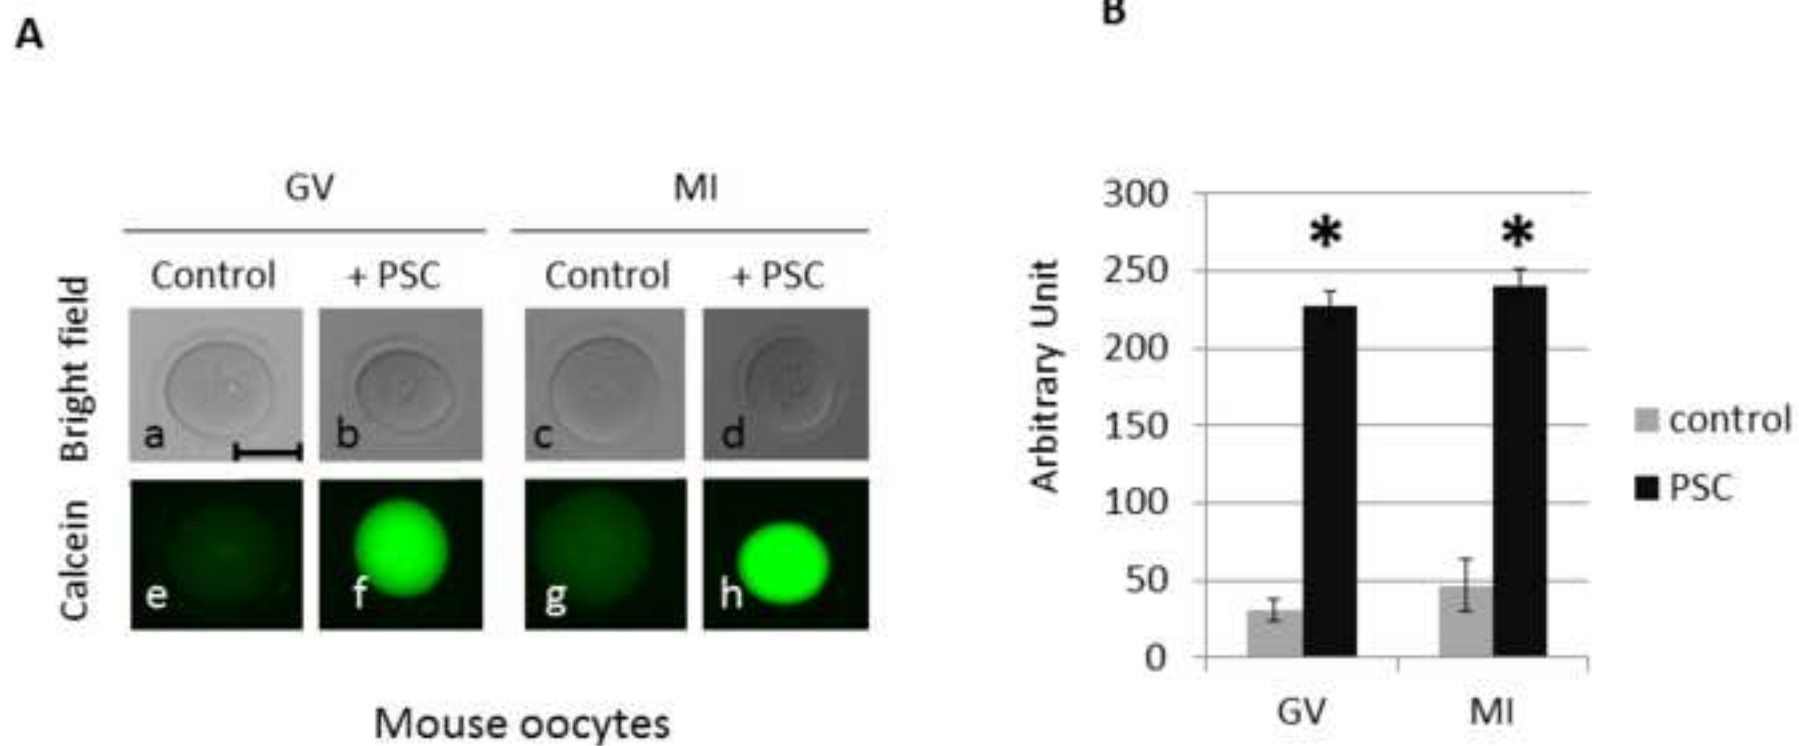

### Supplemental figure 6

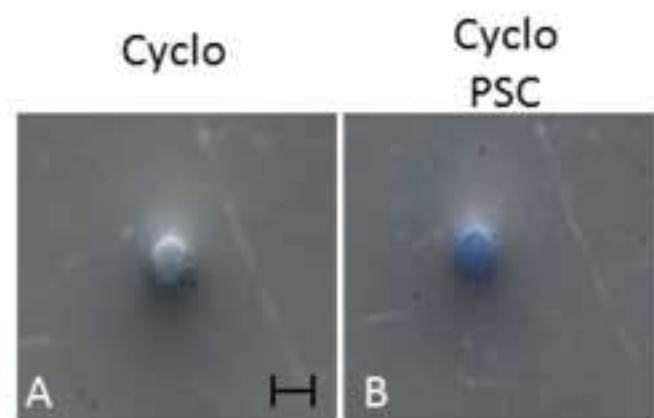

Human oocytes

### Supplemental figure 7

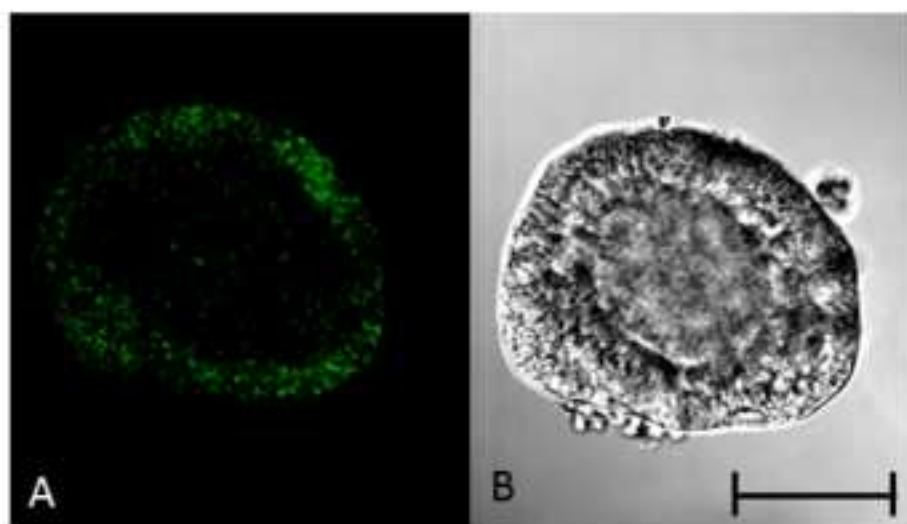

Mouse oocytes
